# Supplementary material for: Silica-free syntheses of hierarchically ordered macroporous polymer and carbon monoliths with controllable mesoporosity
Source: Royal Society of Chemistry journal article supplement (doi:10.1039/b719489g), 2008-01-01
Supplement: b719489g.pdf [file b719489g.pdf]

Supplementary Material (ESI) for Journal of Materials Chemistry

This journal is © The Royal Society of Chemistry 2008

Electronic Supplementary Information (ESI) for  
Journal of Materials Chemistry

This journal is © The Royal Society of Chemistry 2008

Supplementary information for

**Silica-Free Syntheses of Hierarchically Ordered Macroporous Polymer  
and Carbon Monoliths with Controllable Mesoporosity**

*Zhiyong Wang, Elizabeth R. Kiesel and Andreas Stein\**

Department of Chemistry, University of Minnesota, Minneapolis, MN 55455

\*e-mail: [stein@chem.umn.edu](mailto:stein@chem.umn.edu)

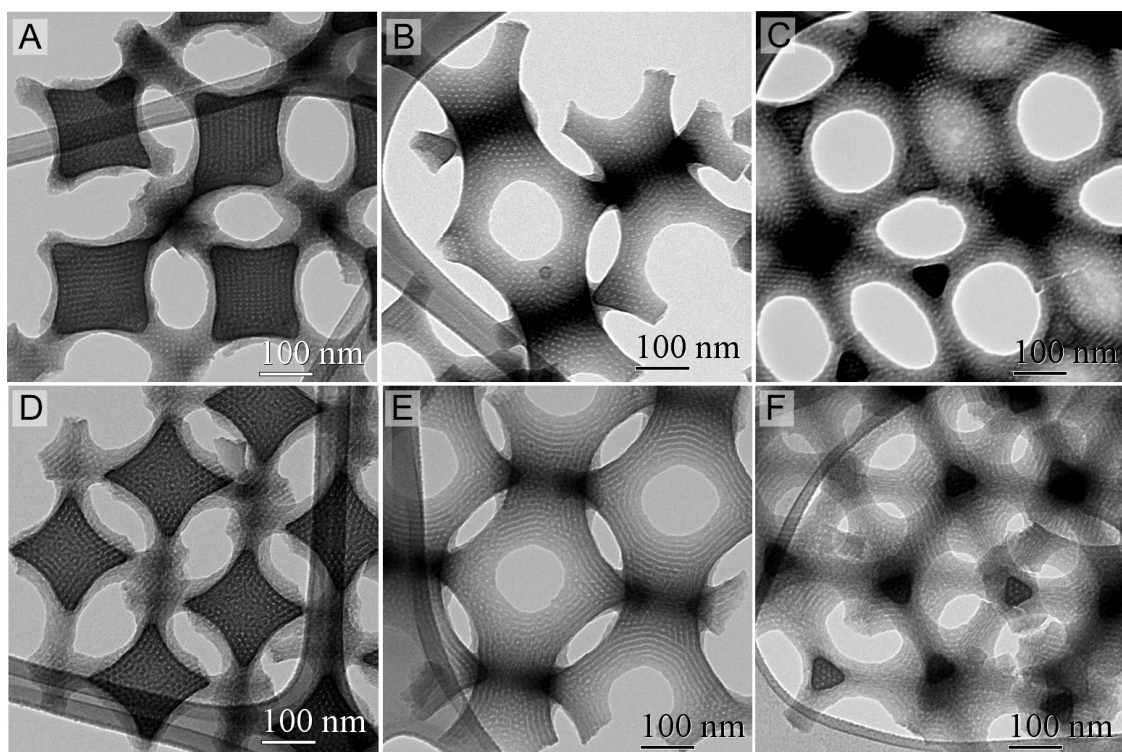

**Figure S1.** TEM images of 3DOM/m-cPF viewed along (A) [100], (B) [110] and (C) [111] axes of the macroporous structure. Corresponding images for 3DOM/m-hPF viewed along the above three directions are shown in panels D, E and F, respectively.

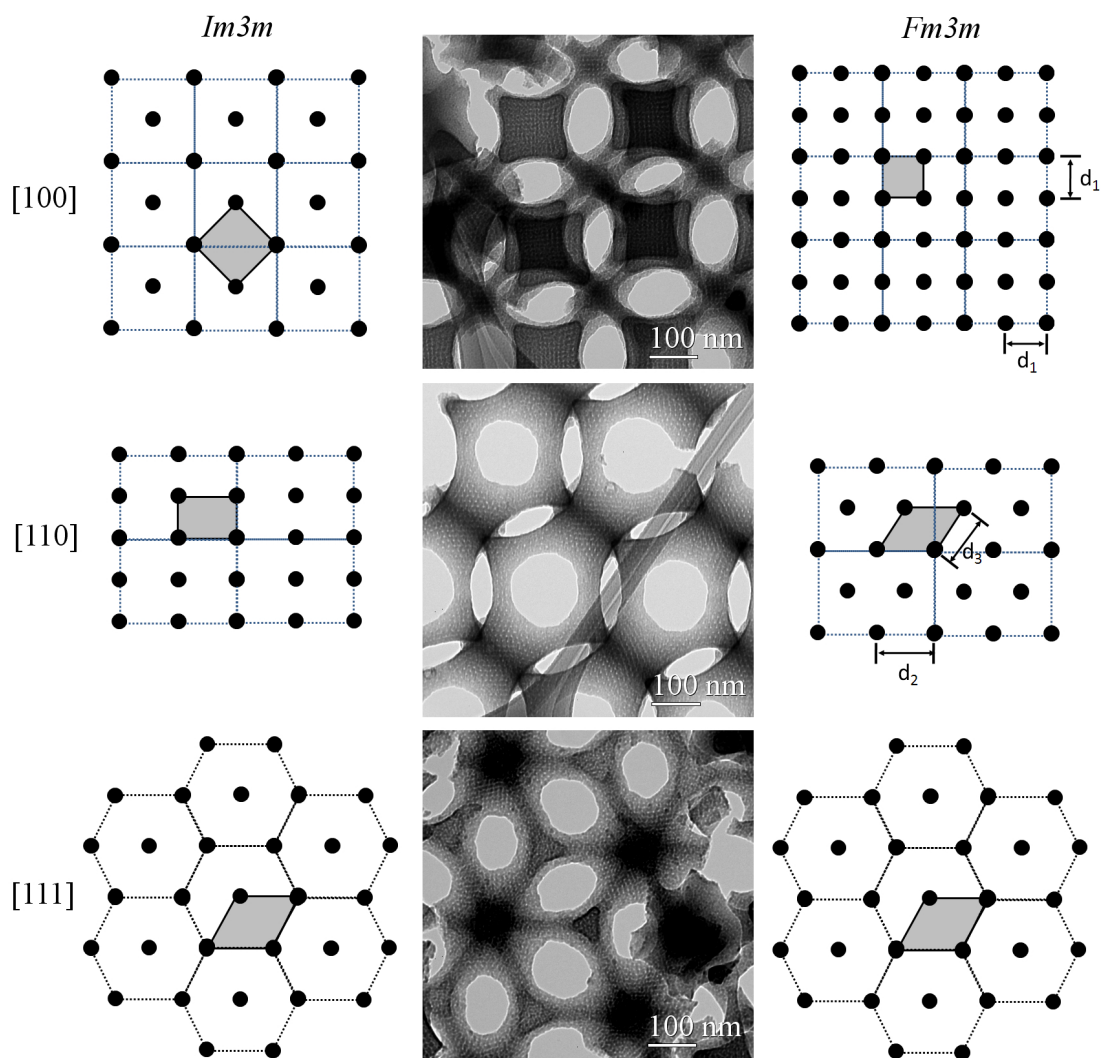

**Figure S2.** Comparison between TEM images of 3DOM/m-cC (middle column) and structural models for the space groups *Im3m* (left column) and *Fm3m* (right column) along the [100] axis (first row), the [110] axis (second row) and the [111] axis (third row). For the [110] direction, only the *Fm3m* model fits the TEM image.

**Table S1.** Measured characteristic distances between adjacent projections of mesopores viewed along different axes for 3DOM/m-cC.

| axis  | distance notation | distance (nm) | length w.r.t. unit cell | calculated $a^l$ value (nm) |
|-------|-------------------|---------------|-------------------------|-----------------------------|
| [100] | $d_1$             | 10.0          | $a/2$                   | 20.0                        |
| [110] | $d_2$             | 12.9          | $a/\sqrt{2}$            | 18.3                        |
| [110] | $d_3$             | 11.2          | $\sqrt{6}a/4$           | 18.4                        |

<sup>l</sup>“ $a$ ” is the length of one cubic unit cell. See Figure S2 for definitions of the distances  $d_n$  ( $n = 1-3$ ).

The average calculated unit cell parameter based on the  $Fm\bar{3}m$  space group is:  $a = 18.9 \pm 1.0$  nm.

The [111] direction was not used for these measurements because of the reduced mesopore order along this direction.
